1 **Title: Electric shock causes fear-like persistent behavioral response in the nematode**

2 *Caenorhabditis elegans*

3

4 **Authors:** Ling Fei Tee<sup>1</sup>, Jared J Young<sup>2</sup>, Ryoga Suzuki<sup>1</sup>, Keisuke Maruyama<sup>1</sup>, Yuto Endo<sup>1,3</sup>,

5 Koutarou D. Kimura<sup>1,3,4\*</sup>

6

7

8 **Affiliations:** 1. Graduate School of Science, Nagoya City University, Nagoya, 467-8501,

9 Japan; 2: Biology Department, Mills College, Oakland, CA, 94613, USA; 3: Department of

10 Biological Sciences, Graduate School of Science, Osaka University, Toyonaka, Osaka, 560-

11 0043, Japan; 4. RIKEN center for Advanced Intelligence Project, Tokyo, 103-0027, Japan

12

13 **Correspondence:** Koutarou D. Kimura, email: kokimura@nsc.nagoya-cu.ac.jp

14

15 **ABSTRACT**

16 Electricity is widely utilized as environmental stimulus to sense the world by many animal  
17 species. Despite its importance, however, molecular and physiological mechanisms for  
18 responding to electrical stimulus have been far less understood compared to other sensory  
19 stimuli. Here we report novel behavioral responses to electrical stimulus of the nematode *C.*  
20 *elegans*. When the animals on food are stimulated by alternating current, their movement  
21 speed suddenly increases more than 2-fold, which persists for a few minutes even after the  
22 electrical stimulation is terminated. Genetic analyses reveal that voltage-gated channels are  
23 required for the response, possibly as the sensors, and neuropeptide signaling suppresses the  
24 persistent response. Additional behavioral analysis reveals that, in addition to the persistence,  
25 the animal's response to electrical shock is scalable and has a negative valence, which are  
26 recently regarded as emotion primitives, suggesting that the response may reflect a primitive  
27 form of "fear" of animals.

## 28 INTRODUCTION

29 In order to survive and reproduce, animals respond to various environmental sensory stimuli  
30 by perceiving and processing these cues within the neural circuit, and convert them into  
31 behavioral outputs. In addition to the well-known stimuli cues, such as light, sound, chemical  
32 and temperature, animals also respond to other stimuli, such as magnetic field and electricity  
33 (Baker et al., 2013; Wiltschko & Wiltschko, 2005).

34

35 In neuroscience research, electricity is used as unconditioned stimulus with negative valence  
36 to cause associative learning in rodents and in flies (Aceves-Piña & Quinn, 1979; Blair et al.,  
37 2005; Tarpley et al., 2010; Tully et al., 1994). In nature, however, multiple animal species are  
38 known to respond to electricity for survival purposes, such as communication, navigation  
39 and/or prey detection (Clarke et al., 2013; Crampton, 2019; Pettigrew, 1999). For example,  
40 weakly electric African fish (*Gnathonemus petersii*) utilize their epidermal electroreceptors to  
41 receive self-produced electric signals, allowing the fish to identify, locate, and examine  
42 nearby objects (von der Emde et al., 1998). In addition, platypus (*Ornithorhynchus anatinus*),  
43 blind cave salamander (*Proteus anguinus*), and bumblebees (*Bombus terrestris*) are also  
44 known to sense electric signals for navigation and/or foraging (Istenič & Bulog, 1984; Roth  
45 & Schlegel, 1988; Scheich et al., 1986; Sutton et al., 2016). Such wide use of electrical  
46 signals in the animal kingdom suggests that the molecular mechanisms of electricity  
47 perception as well as neural circuits to utilize the perceived information have independently  
48 emerged or diverged during evolution. Despite their importance, the molecules required for  
49 responses to electrical signals have only been revealed in sharks and skates: Bellono et al.  
50 reported that electrosensory cells in little skate and chain catshark use L-type voltage-gated  
51 calcium channels (VGCC) (Bellono et al., 2017; 2018).

52

53 The nematode *Caenorhabditis elegans* has been widely used in neurobiological research  
54 because of the feasibility of molecular, physiological, and behavioral analyses of neural  
55 functions. The animals have been known to respond to direct current (DC), migrating along  
56 the electric field from the positive end to the negative end (Sukul & Croll, 1978), and a few  
57 classes of chemosensory neurons (ASH and ASJ) were found to be required for their ability  
58 to align themselves according to the DC field (Gabel et al., 2007). The animals are also  
59 reported to respond to strong alternating current (AC)—they exhibit a "convulsant"  
60 phenotype (paralysis and elongation) upon delivery of a brief electrical shock (200 Hz, 3.5  
61 ms, 47 V) and recover rapidly after removal of the electrical shock (Risley et al., 2016).  
62 However, other behavioral responses as well as molecular mechanisms for electrical signals  
63 have not been revealed.

64

65 In this study, we report that *C. elegans* responds to AC electric stimulus by immediately  
66 increasing their speed. The speed increase lasts for minutes even after an electric stimulus of  
67 seconds is terminated, suggesting that the response is caused not by direct stimulation of the  
68 motor system for rapid movement but possibly by persistent activity of a specific set of  
69 neurons to generate the behavioral response. Further behavioral analyses suggest that, in  
70 addition to the persistence, the behavioral response is associated with valence and scalability,  
71 thus exhibiting at least 3 out of the 4 features of "emotion primitives" (Anderson & Adolphs,  
72 2014). A series of candidate genetic analyses reveal that the response is not mediated by  
73 well-known chemo- or mechano-sensory mechanisms. Instead, it requires both L-type  
74 VGCC, as in the shark and skate, and N-type VGCC, which have not previously been  
75 implicated in animal electrical responses. Furthermore, we find that neuropeptide signaling is  
76 required to suppress the persistence. These results indicate that the animals' response to

77 electric shock can be a suitable paradigm to reveal molecular and physiological mechanisms  
78 of electrosensation as well as a primitive form of emotion, such as fear.

79

## 80 **RESULTS**

### 81 **Worms' speed increases by AC stimulation**

82 In order to study *C. elegans'* response to electric shock, we established a setup (Figure 1),  
83 where several adult wild-type animals were placed onto 9 cm NGM agar plates seeded with a  
84 small bacterial food patch and subjected to AC stimulation. The complete trajectories  
85 produced by the animals were video-recorded, and their speed was calculated based on the *x-*  
86 *y* coordinates of worms' centroids in each image frame.

87

88 We first studied the response to AC stimulation covering a range between 15 - 105 V at 60  
89 Hz (the commercial power frequency in Japan), and found that the animals increased their  
90 average speed during electrical stimulation by varying amounts (Figure 2—figure supplement  
91 1). We then conducted a series of systematic analyses with different voltages and frequencies  
92 at 30 – 75 V and 0.25–256 Hz (Figure 2—figure supplement 2). After the analysis, we  
93 noticed that an interesting characteristic of this behavioral phenotype is most apparent when  
94 using 4 Hz stimuli: When worms were stimulated with 30 V, their average speed of  
95 movement suddenly increased more than 2-fold, and this persisted during the electrical  
96 admission. We named this behavior the “ON response” (Figure 2A and C). During this  
97 running behavior, the worms engage in rapid body bends as well as rapid head movements  
98 (Figure 2—video 1). In the ON response, we did not detect a statistical bias in any direction  
99 (Figure 2—figure supplement 3). Moreover, when a stronger electric stimulus of 75 V was  
100 applied, it caused a significant increase in average speed not during but immediately after the  
101 stimulus, which we named the “OFF response” (Figure 2B). A fraction of the animals

102 responded during the stimulus in the OFF response condition, while, in the majority of the  
103 animals, the speed was suppressed during the stimulus and then increased immediately after  
104 the removal (Figure 2—figure supplement 4 and video 2). During application of voltage,  
105 those worms that are immobilized appear to be convulsing, with jerky, unproductive muscle  
106 contractions occurring throughout the body. With other frequencies, ON and OFF responses  
107 were also observed, but were less clear compared to those with 4 Hz (Figure 2—figure  
108 supplement 1). We considered the ON and OFF responses at 4 Hz to be interesting because  
109 only 2.5-fold differences in the voltage at the same frequency caused completely different  
110 behavioral responses, which does not happen generally with other stimuli, such as odor, to  
111 the animals (Bargmann et al., 1993).

112

113 We then analyzed whether this response depends on voltage or current by manipulating the  
114 salt concentration in the assay plate: The higher salt concentration should result in a larger  
115 current when the same strength of voltage is applied. As shown in Figure 3, 30 V and 75 V  
116 stimulus caused ON and OFF responses, respectively, regardless of the current value,  
117 indicating that the behavioral response depends on voltage.

118

### 119 **Speed increase lasted for several minutes**

120 Next, we examined how long the increased speed persists during and after the stimulus.  
121 When the duration of applied electric shock was 1-2 minutes, significant speed increases  
122 were maintained during the stimulus, lasted for ~1 min after the stimulus, and went back to  
123 the baseline level (Figure 4A). Interestingly, when the animals were stimulated only for 5 sec,  
124 the speed increase still lasted for 1.5 min. When 4 min stimulus was applied, the increase was  
125 maintained during the stimulus but went back to the baseline level 30 sec after the stimulus.  
126 During 10 min stimulation, the significant speed increase was observed only for 5.5 min.

127 Thus, we concluded that the ON response caused by 30 V stimulation persists ~5 min at  
128 most.

129

130 This result suggested the possibility that the speed increase persisted for ~5 min because of  
131 fatigue in motor systems. However, animals stimulated intermittently 5 times for 30 seconds  
132 per stimulation maintained a speed increase for much longer time than those under the  
133 continuous stimulus (Figure 4B versus "10 minutes" in A). This result suggests that the  
134 decrease in speed during the long ON stimulation period is not caused by fatigue in the motor  
135 system, but possibly by sensory adaptation, which is widely known to adjust the animal's  
136 sensory response to new environments (Webster, 2012).

137

138 We then tested the persistence of speed increase in the OFF response with 75 V.  
139 Interestingly, 5 and 30 sec stimuli caused longer persistent responses after the stimulus than  
140 30 V did (Figure 4C). 45 sec stimulus caused >2 min persistent response, which is the longest  
141 among the responses to 30 and 75 V stimuli after the stimulus. However, when animals were  
142 stimulated for 1 min, no ON or OFF responses was observed, possibly due to physical  
143 damage to the animals. The fact that the larger stimulus (75 V) caused longer persistent  
144 responses than the smaller one (30 V) suggests that the response to electric shock is  
145 "scalable", one of the critical "emotion primitives" together with persistence (Anderson &  
146 Adolphs, 2014).

147

148 We then tested the effect of food presence on the speed increase. *C. elegans* move slowly on  
149 the bacterial food lawn and faster out of the lawn (Sawin et al., 2000). As we used a small  
150 food lawn to localize the animal's initial positions in the center of the plate (Figures 1 and  
151 2C), it was possible that the electrical stimulus caused the animals to move away from the

152 food lawn, which then caused increased speed due to the absence of food. If this is the case,  
153 the animal's speed would be considerably lower with the electrical stimulus when the plates  
154 were fully covered with a bacterial lawn. To test the hypothesis, we compared the time-  
155 course of speed changes on plates with a small patch of food lawn and with a full food lawn.  
156 As shown in Figure 4D and E (compare Figure 4A "4 minutes" and B "30 seconds",  
157 respectively), there was no substantial difference in the time course of speed change between  
158 the behavioral responses on the small food and the full food plates, demonstrating that the  
159 speed increase is not caused by the food absence but by the electrical stimulation itself.

160

161 To further confirm the result, we analyzed the animals' speed on a stripe-like food pattern  
162 (Figure 4—figure supplement 1A). We did not observe a significant difference in the speeds  
163 when the animals moved into or out of the food area (Figure 4—figure supplement 1B). This  
164 result indicates that the animals' migratory speed is not affected by the presence or absence of  
165 food, which is one the most influential environmental signals for the animals. It may further  
166 suggest that animals prioritize moving away from a harmful condition, such as strong  
167 electrical shock, to protect themselves.

168

169 **Two types of voltage-gated calcium channels, but not chemo- or mechano-sensory**  
170 **molecules, are required for the sensation of electric shock.**

171 To identify gene(s) required for the response to electric shock, we analyzed a series of mutant  
172 strains of candidate genes. We tested the mutants of genes involved in the animals' chemo- or  
173 mechano-sensation, the homologues of genes involved in electroreception in shark and skate,  
174 and genes involved in the biosynthesis of neuromodulators.

175



176 *C. elegans*' chemo-sensation is largely mediated by the 12 pairs of amphid sensory neurons in  
177 the head, which are classified into the ones using TAX-2 and TAX-4 cyclic nucleotide-gated  
178 channel (CNGC) subunits or the others using OSM-9 and OCR-2 transient receptor potential  
179 (TRP) channel subunits for depolarization (Coburn & Bargmann, 1996; Colbert et al., 1997;  
180 Komatsu et al., 1996; Tobin et al., 2002). In addition to loss-of-function mutants for the  
181 above-mentioned genes, we tested mutants for *che-2*, a gene required for the proper  
182 formation and function of the ciliated sensory neurons (Fujiwara et al., 1999). For mechano-  
183 sensation, we analyzed loss- or reduction-of-function alleles of *mec-4*, *mec-10*, and *trp-4*.  
184 *mec-4* and *mec-10* genes encode DEG/ENaC proteins and form a mechanosensory ion  
185 channel complex for transduction of gentle touch (Chalfie & Sulston, 1981; Driscoll &  
186 Chalfie, 1991; Huang & Chalfie, 1994), while *trp-4* encodes TRPN (NOMPC) for harsh  
187 touch response (Kang et al., 2010; Li et al., 2011). All the mutant strains exhibited wild-type-  
188 like responses in ON as well as OFF responses (panel A in Figures 5 and 6 for ON and OFF  
189 responses, respectively). Some mutants (*osm-9;ocr-2*, *che-2*, *mec-10*, and *tph-1*) exhibited  
190 statistical differences in the OFF response, suggesting the partial involvement of these genes,  
191 although the defects in speed increase (i.e.  $\Delta$ Speed) were not as severe as the ones of VGCC  
192 mutants (see below). The non-involvement of *tax-4* also indicates that temperature increase  
193 caused by the electric stimulus or speed increase induced by high O<sub>2</sub> due to the *npr-1*  
194 mutation is not responsible for the response (Coates & de Bono, 2002) (see Discussion for  
195 details).

196

197 We then tested *egl-19*, the orthologue of the L-type VGCC alpha subunit, which functions in  
198 the sensory organ for environmental electric signals for shark and skate (Bellono et al., 2017,  
199 2018). We found that two reduction-of-function alleles of *egl-19* mutants exhibited strong

200 defects in ON and OFF responses (Figures 5 and 6, panels B and F). This result suggests that  
201 the VGCC may be an evolutionarily conserved sensor for environmental electricity.

202

203 This finding further motivated us to test two other types of voltage-gated calcium channels,  
204 i.e. N-type voltage-gated calcium channel (UNC-2) and T-type voltage-gated calcium  
205 channel (CCA-1), although only L-type VGCC had been found to be involved in electrical  
206 responses in other animals. Unexpectedly, mutants for two alleles of *unc-2* were defective in  
207 both ON and OFF responses, while *cca-1(ad1650)* mutants behaved similar to the wild-type  
208 controls (Figures 5 and 6, panels B and F). These results demonstrate that UNC-2, the N-type  
209 VGCC, is also required for the electric sensation, and also suggest that the worms may utilize  
210 similar but substantially different molecular mechanisms for electrical sensation than sharks  
211 and skates.

212

213 Lastly, we analyzed the genes required for the biosynthesis of neuromodulators, such as  
214 serotonin, dopamine, octopamine and tyramine. As shown in panel C in Figures 5 and 6,  
215 these mutants also exhibited wild-type-like responses, indicating that these neuromodulators  
216 are not involved either. Because dopamine and serotonin signaling are known to be required  
217 for the feeding status-dependent modulation of migratory speed, these results are also  
218 consistent with the fact that feeding status is not the causal reason for the speed increase  
219 (Figure 4D and E, and Figure 4—figure supplement 1).

220

221 We also tested the involvement of neuropeptides by using loss- or reduction-of-function  
222 mutations of *egl-3*, a gene required for maturation of pro-neuropeptides (Kass et al., 2001).  
223 Unexpectedly, mutations in both alleles of *egl-3*, *n589* and *ok979*, caused much longer  
224 persistence of the speed increase after the electric shock (Figures 5 and 6, panels D-F),

225 indicating that the persistent activity in the neural circuit for speed increase is down-regulated  
226 by neuropeptide signaling in the wild-type animals.

227

## 228 **DISCUSSION**

### 229 **Response to AC stimulus and its molecular mechanism**

230 Multiple vertebrate and invertebrate species are known to sense electric signals for navigation  
231 and/or foraging. For example, in addition to the electrical fish, platypus (*Ornithorhynchus*  
232 *anatinus*) detects electrical signals via their duck-like bills to locate and avoid objects when  
233 navigating in the water (Scheich et al., 1986). Blind cave salamander (*Proteus anguinus*)  
234 perceives a moving back-and-forth direct-current field and its polarity via ampullary organs  
235 to survive and navigate in their environment, which is in complete darkness as their eyes are  
236 undeveloped (Istenič & Bulog, 1984; Roth & Schlegel, 1988). And in invertebrates,  
237 bumblebees (*Bombus terrestris*) sense environmental electric fields via sensory hairs to make  
238 foraging decisions (Sutton et al., 2016). These results suggest that sensation of electrical  
239 signals are essential for survival and reproduction of animals in the wild.

240

241 In this study, we established an original experimental paradigm and found that *C. elegans*  
242 responds to AC electrical stimulus: The animals significantly increase their movement speed  
243 during and after the stimulus for minutes. Although the animals have also been reported to  
244 respond to DC (Gabel et al., 2007), we consider that the responses to AC and DC are  
245 different for the following reasons. (1) In the DC field, the animals moved at a certain angle  
246 ( $\sim 4^\circ$  per 1 V/cm), which was not observed in our AC stimulus ( Figure 2—figure supplement  
247 3). (2) Movement speed did not change with the DC stimulus.

248

249 In addition, five pairs of amphid sensory neurons were involved in the DC response (Gabel et  
250 al., 2007), while mutations in genes required for sensory signaling in the amphid sensory  
251 neurons (*tax-4*, *osm-9*, *ocr-2*, and *che-2*) did not affect the AC response in our study (Figures  
252 5 and 6), indicating that DC and AC responses utilize different sensory mechanisms. Our  
253 result also rules out the possibility that the animals respond to increased agar temperature due  
254 to the AC stimulus, because the mutation in *tax-4*, the gene essential for temperature response  
255 (Komatsu et al., 1996) did not affect the response. In addition, the genes required for  
256 mechano-sensation (*mec-4*, *mec-10*, and *trp-4*) are not required for the AC response either.

257

258 We found that L-type as well as N-type VGCC, EGL-19 and UNC-2, respectively, are  
259 required for the AC response. L-type VGCC has been found to function in the electrosensory  
260 organs in the shark and skate, but not N-type, indicating that *C. elegans* utilizes similar but  
261 different molecular mechanisms. Since EGL-19 is expressed in most if not all the neurons  
262 (Lee et al., 1997), it will be interesting to identify the neurons in which the channel functions,  
263 whether they are the same or different from the neurons that utilize the N-type channels, and  
264 how they contribute to the increase in the movement speed. As mentioned above, various  
265 organs in different animal species are known to sense electrical stimuli. Therefore, it would  
266 be interesting to investigate whether L-type as well as N-type VGCCs also function in the  
267 organs of these animals to sense electrical signals.

268

### 269 **Electric stimulus causes persistent behavioral response.**

270 Persistent neural activity, a sustained neural activity caused by a short-term stimulus, plays  
271 critical roles in brain function, such as controlling the oculo-motor system, working memory,  
272 and decision making, although its detailed mechanisms have not been sufficiently elucidated  
273 (Curtis & Lee, 2010; Major & Tank, 2004). Persistent behavioral state is likely caused by

274 persistent neural activity, suggesting that genetic analysis of persistent behavioral state may  
275 reveal molecular mechanism(s) of persistent neural activity.

276

277 We unexpectedly found that *C. elegans*' high speed response persists after electrical shock. In  
278 the animals, two other types of persistent behavioral responses have been reported. The first  
279 is that the animal's movement speed is elevated at high O<sub>2</sub> concentration in *npr-1(lf)* and in  
280 the Hawaiian wild isolate CB4856, which has the same amino acid variation in *npr-1*  
281 (Cheung et al., 2005). In this behavioral response, the elevated speed returns rapidly to the  
282 basal speed when the high O<sub>2</sub> is terminated, the animals still recognize and aggregate at the  
283 edge of a food lawn, and a mutation in the *tax-4* CNGC homolog for sensory depolarization  
284 abolishes the response (Coates & de Bono, 2002). Another type of persistent behavioral  
285 response is roaming (Flavell et al., 2020; Manabi Fujiwara et al., 2002). Roaming is a  
286 behavioral state with high movement speed, although it is only exhibited when the animals  
287 are on food and requires serotonin signaling. Because the behavioral response to electrical  
288 shock persists more than 2 min after 30-45 sec stimulus with 75 V and more than 1.5 min  
289 after only 5 sec stimulus, is not affected by food stimulus, and does not require CNGC  
290 activity or serotonin signaling, the analysis of electrical shock response is likely different  
291 from the above-mentioned two behavioral responses and may provide a unique opportunity  
292 for genetic dissection of a persistent behavioral state.

293

294 **Response to the electric stimulus may reflect a primitive form of emotion.**

295 Anderson and Adolphs defined emotion as an internal state triggered by specific stimuli  
296 likely rewarding or punishing and that persistence, scalability, valence, and generalization are  
297 key characteristics for primitive forms of emotion in animals (Anderson & Adolphs, 2014).

298

299 In addition to persistence, we consider that the electrical stimulus has negative valence. This  
300 is because the animals ignore food during the electrical shock response, despite the fact that  
301 food is one of the most influential signals for *C. elegans*, affecting many aspects of their  
302 behavior. For example, during the high speed state caused by high O<sub>2</sub>, animals still recognize  
303 and stay at the edge of a food lawn (Cheung et al., 2005; Coates & de Bono, 2002),  
304 suggesting that the electrical shock signal has a strong negative valence that overrides the  
305 strong positive valence of food. The third point is the scalability—stronger stimulus causes  
306 stronger behavioral response. Compared to the 30 V stimulus, the 75 V stimulus results in a  
307 larger number of immobile animals during the stimulus period (right panels in Figure 2A and  
308 B) as well as a longer high speed response after the stimulus (compare the panels for  
309 responses to 5 and 30 second stimulus in Figure 4A and C).

310

311 In summary, we found that *C. elegans* responds to electrical shock, which is regulated by  
312 VGCCs and neuropeptide signaling. Our findings may suggest the following model (Figure  
313 7). When the animals sense 30 or 75V AC stimulus at 4 Hz, the stimulus is sensed with the L-  
314 and N-type VGCCs and their internal state transits from basal speed state to persistent high  
315 speed state. The persistent high speed state eventually returns to the basal speed state, which  
316 requires neuropeptide signaling. Thus, by studying the electrical responses of *C. elegans*, we  
317 will be able to investigate the mechanisms of animal electroception, persistent activity, and  
318 possibly a primitive form of emotion.

319

## 320 **MATERIALS AND METHODS**

### 321 ***C. elegans* strains**

322 *C. elegans* strains were maintained with standard procedures (Brenner, 1974). In brief, for  
323 regular cultivation, animals were grown on standard 6 cm nematode growth medium (NGM)

324 agar plates which had been spread with *E. coli* strain OP50 and incubated at 19.0-19.5 °C.  
325 Strains used were the wild-type strain Bristol N2 and mutant strains PR678 *tax-4(p678)*,  
326 CX4652 *osm-9(ky10);ocr-2(ak47)*, CB1033 *che-2(e1033)*, TU253 *mec-4(u253)*, ZB2551  
327 *mec-10(tm1552)*, TQ296 *trp-4(sy695)*, MT1212 *egl-19(n582)*, DA995 *egl-19(ad995)*, VC39  
328 *cca-1(ad1650)*, CB55 *unc-2(e55)*, VC854 *unc-2(gk366)*, KDK11 *cat-2(tm2261)*, MT7988  
329 *bas-1(ad446)*, GR1321 *tph-1(mg280)*, RB993 *tdc-1(ok914)*, VC671 *egl-3(ok979)* and  
330 MT1219 *egl-3(n589)* .

331

### 332 ***C. elegans* cultivation for electric shock behavioral assay**

333 Before the behavioral assay, animals were cultivated as described previously (Kimura et al.,  
334 2010). In brief, four adult wild-type animals were placed onto NGM agar plates with OP50  
335 and kept at 19.5°C for 7.5 hours before being removed. After removal, these plates were  
336 incubated at 19.5 °C for 3 days until the assay day. On the assay day, about 100 synchronized  
337 young adult animals were grown on each plate. As some mutant animals had slower growth  
338 or laid fewer eggs than wild-type animals did, the incubation temperature and number of  
339 these mutant animals were adjusted and increased accordingly in order to obtain a  
340 comparable developmental stage (i.e. young adult) with the wild-type animals. All behavioral  
341 assays were carried out with young adult hermaphrodites.

342

### 343 **Experimental instruments for electric shock behavioral assay**

344 The following electrical instruments (Figure 1) were utilized for the electric shock behavioral  
345 assay. A 50 MHz Arbitrary Waveform Generator (FGX-295, Texio Technology Corporation)  
346 was used to generate different types of electrical waveforms over a wide range of  
347 frequencies. However, this waveform generator has an output limit of 10 V. Thus, an AC  
348 Power Supply (PCR500MA, Kikusui Electronics Corp.) was used to amplify the voltage

349 supply. We also used an Digital Storage Oscilloscope (DCS-1054B, Texio Technology  
350 Corporation) in parallel to measure the voltage and observe the electrical waveforms  
351 produced as well as a Digital Multimeter (PC720M, Sanwa Electric Instrument Co., Ltd.) to  
352 measure current. A USB camera (DMK72AUC02, The Imaging Source Co., Ltd.) with a lens  
353 (LM16JC5M2, Kowa) was used to record trajectories produced by the animals.

354

### 355 **Electric shock behavioral assay with small OP50 bacterial food patch**

356 Most of the behavioral assays were conducted on 9 cm NGM agar plates seeded with a small  
357 food patch unless indicated otherwise: For the food patch, the bacteria OP50 was grown in  
358 100 mL of LB culture overnight at 37°C, spun down and resuspended in 10 volumes of NGM  
359 buffer, and 5  $\mu$ L of the suspension was applied at the center of the plate with 3  $\times$  10 mm in  
360 size on the assay day. This is to minimize the thickness of food patch as it prevents clear  
361 images of worms in the patch. Four animals per plate were placed in the food patch one hour  
362 before the assay to accustom the animals to the environment and to reduce their movement  
363 speed to the basal level. The assay plates were then inverted and placed onto a custom-made  
364 copper plate bridge, whose distance is 6 cm (Figure 1), the images were acquired 2 frames  
365 per s, and electric shock was delivered with the conditions described in each figure. Move-  
366 tr/2D software (Library Inc., Japan) was used to calculate the *x-y* coordinates of the animal  
367 centroids in each image frame, which were then analyzed using Excel (Microsoft) or R (The  
368 R Project). Baseline speed was calculated from the average speed over 30 s before the  
369 stimulation, and  $\Delta$ Speed was calculated by subtracting the baseline value from each animal's  
370 speed during or after the stimulus.

371

### 372 **Electric shock behavioral assay with full OP50 bacterial food lawn**



373 For the assays conducted with full food lawn, the assay plates were seeded with OP50 and  
374 kept on the bench overnight until the assay began. Animals grown in regular cultivation  
375 plates were washed in two droplets of NGM buffer and then transferred to the center of the  
376 assay plate and left for 5 minutes. The rest of the procedures were the same as for assays  
377 conducted with small food patch.

378

### 379 **Investigation of relationship between speed increase, current and voltage**

380 Three different types of NGM agar plates were prepared with varying salt concentration and  
381 similar osmolarity: High-salt plates had 200 mM of sodium chloride; low-salt plates had 10  
382 mM of sodium chloride and 380 mM of sucrose; control plates had 50 mM sodium chloride  
383 and 300 mM of sucrose. The purpose of adding sucrose into the plates was to adjust and  
384 balance the osmolarity. The final total osmolarity for sodium chloride ( $\text{Na}^+$  and  $\text{Cl}^-$ ) and  
385 sucrose, the osmo-regulator, for all the plates was 400 mOsm. The rest of the procedures  
386 were the same as for assays conducted with small food patch.

387

### 388 **Data analysis and statistics**

389 All the statistical analyses were performed in R (The R Project). Generally, data of 20 – 50  
390 animals in total from 9 plates from 3 days of experiments for each condition were pooled and  
391 analyzed together. We chose this sample number based on a large scale behavioral analysis of  
392 *C. elegans* (Yemini et al., 2013). Data is presented as means  $\pm$  SD unless otherwise specified.

393

### 394 **FIGURE LEGENDS**

395 **Figure 1.** Experimental setup for electrical shock experiment. This setup consists of an  
396 arbitrary waveform generator, amplifier, multimeter, camera, desktop computer and  
397 oscilloscope.

398

399 **Figure 2.** Animals' speed is increased by AC stimulation. **A,** (Left) Speed-time graph with 30  
400 V stimulation at 4 Hz. Thin and thick lines are for individual and average values,  
401 respectively. Gray indicates the duration of electrical stimulation (0-30 s). (Right) Scatter plot  
402 showing average speed of individual animals before, during and after electrical stimulation.  
403 Each period is 30 s. n = 35. **B,** Speed-time graph (left) and scatter plot (right) with 75 V  
404 stimulation at 4 Hz. n = 36. **C,** Cartoons of worm's response to the electrical shock. (Left)  
405 When electrical stimulation is absent, the worms stay on food patch and maintain their speed  
406 at around 0.1 mm/s. (Right) When electrical stimulation is delivered, the worms increase  
407 speed to around 0.2 - 0.3 mm/s and leave the food patch. Statistical values were calculated  
408 using Friedman test with *post hoc* Wilcoxon test with Bonferroni correction. \*\*  $p < 0.001$ .

409

410 **Figure 2—figure supplement 1.** Speed-time graphs with different voltage stimulation at 60  
411 Hz.

412 **Figure 2—figure supplement 2.** Speed-time graphs with different voltage stimulation at  
413 different frequencies.

414 **Figure 2—figure supplement 3.** Movement directions of animals during the response.

415 **Figure 2—figure supplement 4.** Low and high speed groups during 75 V stimulation.

416

417 **Figure 3.** Speed increase is dependent on voltage, not on current. **A,** Voltage-current graph  
418 with different salt concentrations (indicated by different symbols). Each dot represents the  
419 measured value on the day of the experiment. The final total osmolarity for sodium chloride  
420 ( $\text{Na}^+$  and  $\text{Cl}^-$ ) and sucrose for all the plates was 400 mOsm. **B–E,** Behavioral responses of  
421 animals assayed on high-salt plate with 30 V (**B**; n = 32), on control plate with 75 V (**C**; n =  
422 35) or 30 V (**D**; n = 36), or on low-salt plate with 75 V (**E**; n = 34). Stimulation period is

423 indicated by a shaded grey box. **F–I**, Scatter plot showing average speed of individual  
424 animals before, during and after electrical stimulation, corresponding to the panels **B–E**,  
425 respectively. Statistical values were calculated using Friedman test with *post hoc* Wilcoxon  
426 test with Bonferroni correction. \*\*  $p < 0.001$ .

427

428 **Figure 4.** Speed increase persisted for minutes even after the stimulation. **A**, Speed-time  
429 graphs of ON response with 30 V stimulation of different time periods, ranging from 5  
430 seconds to 10 minutes. **B**, Speed-time graph for intermittent electrical stimulation of 30  
431 seconds, 5 times with 90 s–intervals. **C**, Speed-time graphs of OFF response with 75 V  
432 stimulation of different time periods, ranging from 5 seconds to 1 minute. **D** and **E**, Speed-  
433 time graphs for electrical stimulation of 30 V for 4 minutes (**D**) or 75 V for 30 s (**E**) with  
434 worms placed on full food lawn. Shaded regions around the lines represent standard  
435 deviation. Statistical values were calculated using Kruskal-Wallis test with *post hoc*  
436 Wilcoxon test with Bonferroni correction. \*  $p < 0.01$ , \*\*  $p < 0.001$ . Sample numbers were  
437 32–46 per condition, and the details are described in Supplementary Table.

438

439 **Figure 4—figure supplement 1.** Worms' speed did not change when they move in or out of  
440 food.

441

442 **Figure 5. ON response is dependent on VGCC, and the persistence is regulated by**  
443 **neuropeptide signaling.** **A–D**, Speed-time graphs of ON response with 30 V stimulation of 4  
444 min on mutants of sensory signaling (**A**), VGCC (**B**), biogenic amine biosynthesis (**C**), and  
445 neuropeptide biosynthesis (**D**). **E**, Scatter plot showing  $\Delta$ speed of individual animals during  $t$   
446 = 330–360 s in **D**. **F**, Scatter plot showing  $\Delta$ speed of individual animals during the  
447 stimulation. In a series of daily experiments, wild-type N2 and three to five mutant strains

448 were analyzed in parallel, and all the N2 data are combined in **F**. Statistical values were  
449 calculated using Kruskal-Wallis test with *post hoc* Wilcoxon test with Bonferroni correction.  
450 \*\*  $p < 0.001$ . Sample numbers were 30–36 per mutant strain, and the details are described in  
451 the Supplementary Table.

452

453 **Figure 6. OFF response is dependent on VGCC, and the persistence is regulated by**  
454 **neuropeptide signaling. A–D**, Speed-time graph of ON response with 75 V stimulation of  
455 30 s on mutants of sensory signaling (**A**), VGCC (**B**), biogenic amine biosynthesis (**C**), and  
456 neuropeptide biosynthesis (**D**). **E**, Scatter plot showing  $\Delta$ speed of individual animals during  $t$   
457 = 180–210 s in **D**. **F**, Scatter plot showing  $\Delta$ speed of individual animals during the  
458 stimulation. In a set of daily experiments, wild-type N2 and three to four (???) mutant strains  
459 were analyzed in parallel, and all the N2 data are combined in **F**. Statistical values were  
460 calculated using Kruskal-Wallis test with *post hoc* Wilcoxon test with Bonferroni correction.  
461 \*\*  $p < 0.001$ . Sample numbers were 30–36 per condition, and the details are described in the  
462 Supplementary Table.

463

464 **Figure 7. Model for mechanism of speed increase caused by electrical shock.**

465

#### 466 SUPPLEMENTARY FIGURE LEGENDS

467 **Figure 2—figure supplement 1.** Speed-time graphs with different voltage stimulation at 60  
468 Hz. Gray indicates the duration of electrical stimulation (0–30 s). The thick line and the  
469 shaded region indicate the average  $\pm$  SD. Sample numbers were 57–58 per condition, and the  
470 details are described in the Supplementary Table.

471

472 **Figure 2—figure supplement 2.** Speed-time graphs with different voltage stimulation at  
473 different frequencies. Gray indicates the duration of electrical stimulation (0-30 s). The thick  
474 line and the shaded region indicate the average  $\pm$  SD. Sample numbers were 33–37 per  
475 condition, and the details are described in the Supplementary Table.

476

477 **Figure 2—figure supplement 3.** Movement directions of animals during the response. The  
478 angles of movement vectors from the beginning to the first 2 min of the stimulation were  
479 plotted. **A-C**, Rose plot for animals which were assayed on plate with small food patch (**A**,  $n$   
480 = 35, 30 V at 4 Hz), full food lawn (**B**,  $n$  = 85, 30 V at 4 Hz), or small food patch (**C**,  $n$  = 36,  
481 without electrical stimulation). Bin number for each chart is set at 16 bins. Statistical analysis  
482 performed is Watson U2 test.

483

484 **Figure 2—figure supplement 4.** Low and high speed groups during 75 V stimulation. **A**,  
485 Histogram and its density (black line) indicates speed of each animal during the electrical  
486 shock. From the histogram, we set the threshold as 0.125 mm/s to separate the low- (**B**) and  
487 high-speed (**C**) groups. Sample numbers were 20 and 15 for lower and higher speed groups,  
488 and the details are described in Supplementary Table.

489

490 **Figure 4—figure supplement 1.** Worms' speed did not change when they move in or out of  
491 food. **A**, Illustration showing worms' movement across multiple food strips. When worms  
492 leave food strip and enter no food area, this movement is defined as “outward movement”.  
493 When worms enter food strip from no food area, this movement is defined as “inward  
494 movement”. **B**, Scatter plot showing average speed of individual animals with outward (left;  
495  $n$  = 44) or inward (right;  $n$  = 32) movement during 30 V stimulation for 4 min. The average

496 speed was calculated 10 s before and after the food exit/entry. Statistical analysis was  
497 performed by Wilcoxon signed-rank test, and no significant difference was observed.

498

#### 499 **ACKNOWLEDGEMENT:**

500 We thank Yuki Tanimoto and Yuka Tsuda for the initial phase of the electrical shock  
501 paradigm, Shinobu Aoyagi for setting up the system, and Young-Jay You, Aki Takahashi,  
502 and the Kimura lab members for their valuable advice, comments and technical assistance for  
503 the study. Nematode strains were provided by the Caenorhabditis Genetics Center (funded by  
504 the NIH Office of Research Infrastructure Programs P40 OD010440).

505

#### 506 **FUNDING:**

507 This study was supported by Japan Society for the Promotion of Science (KAKENHI  
508 JP16H06545, 20H05700 and 21K19274 to K.D.K.), Grant-in-Aid for Research in Nagoya  
509 City University (48, 1912011, 1921102 and 2121101), the Joint Research by National  
510 Institutes of Natural Sciences (01112002), Toyoaki Scholarship Foundation, and RIKEN  
511 Center for Advanced Intelligence Project (to K.D.K).

512

#### 513 **COMPETING INTERESTS**

514 The authors declare no competing interests.

515

#### 516 **REFERENCES:**

- 517 Aceves-Piña, E. O., & Quinn, W. G. (1979). Learning in normal and mutant *Drosophila*  
518 larvae. *Science*, 206(4414), 93–96. <https://doi.org/10.1126/science.206.4414.93>
- 519 Anderson, D. J., & Adolphs, R. (2014). A Framework for Studying Emotions across Species.  
520 *Cell*, 157(1), 187–200. <https://doi.org/10.1016/j.cell.2014.03.003>

- 521 Baker, C. V. H., Modrell, M. S., & Gillis, J. A. (2013). The evolution and development of  
522 vertebrate lateral line electroreceptors. *Journal of Experimental Biology*, 216(13), 2515–  
523 2522. <https://doi.org/10.1242/jeb.082362>
- 524 Bargmann, C. I., Hartwig, E., & Horvitz, H. R. (1993). Odorant-selective genes and neurons  
525 mediate olfaction in *C. elegans*. *Cell*, 74(3), 515–527.  
526 [https://doi.org/https://doi.org/10.1016/0092-8674\(93\)80053-H](https://doi.org/https://doi.org/10.1016/0092-8674(93)80053-H)
- 527 Bellono, N. W., Leitch, D. B., & Julius, D. (2017). Molecular basis of ancestral vertebrate  
528 electroreception. *Nature*, 543(7645), 391–396. <https://doi.org/10.1038/nature21401>
- 529 Bellono, N. W., Leitch, D. B., & Julius, D. (2018). Molecular tuning of electroreception in  
530 sharks and skates. *Nature*, 558(7708), 122–126. [https://doi.org/10.1038/s41586-018-](https://doi.org/10.1038/s41586-018-0160-9)  
531 0160-9
- 532 Blair, H. T., Huynh, V. K., Vaz, V. T., Van, J., Patel, R. R., Hiteshi, A. K., Lee, J. E., &  
533 Tarpley, J. W. (2005). Unilateral Storage of Fear Memories by the Amygdala. *The*  
534 *Journal of Neuroscience*, 25(16), 4198 LP – 4205.  
535 <https://doi.org/10.1523/JNEUROSCI.0674-05.2005>
- 536 Brenner, S. (1974). THE GENETICS OF <em>CAENORHABDITIS</em>  
537 <em>ELEGANS</em>. *Genetics*, 77(1), 71 LP – 94.  
538 <http://www.genetics.org/content/77/1/71.abstract>
- 539 Chalfie, M., & Sulston, J. (1981). Developmental genetics of the mechanosensory neurons of  
540 *Caenorhabditis elegans*. *Developmental Biology*, 82(2), 358–370.  
541 [https://doi.org/https://doi.org/10.1016/0012-1606\(81\)90459-0](https://doi.org/https://doi.org/10.1016/0012-1606(81)90459-0)
- 542 Cheung, B. H. H., Cohen, M., Rogers, C., Albayram, O., & de Bono, M. (2005). Experience-  
543 Dependent Modulation of *C. elegans* Behavior by Ambient Oxygen. *Current Biology*,  
544 15(10), 905–917. <https://doi.org/https://doi.org/10.1016/j.cub.2005.04.017>
- 545 Clarke, D., Whitney, H., Sutton, G., & Robert, D. (2013). Detection and Learning of Floral

- 546 Electric Fields by Bumblebees. *Science*, 340(6128), 66 LP – 69.  
547 <https://doi.org/10.1126/science.1230883>
- 548 Coates, J. C., & de Bono, M. (2002). Antagonistic pathways in neurons exposed to body fluid  
549 regulate social feeding in *Caenorhabditis elegans*. *Nature*, 419(6910), 925–929.  
550 <https://doi.org/10.1038/nature01170>
- 551 Coburn, C. M., & Bargmann, C. I. (1996). A Putative Cyclic Nucleotide–Gated Channel Is  
552 Required for Sensory Development and Function in *C. elegans*. *Neuron*, 17(4), 695–706.  
553 [https://doi.org/https://doi.org/10.1016/S0896-6273\(00\)80201-9](https://doi.org/https://doi.org/10.1016/S0896-6273(00)80201-9)
- 554 Colbert, H. A., Smith, T. L., & Bargmann, C. I. (1997). OSM-9, A Novel Protein with  
555 Structural Similarity to Channels, Is Required for Olfaction, Mechanosensation, and  
556 Olfactory Adaptation in *Caenorhabditis elegans*; *The Journal of*  
557 *Neuroscience*, 17(21), 8259 LP – 8269. [https://doi.org/10.1523/JNEUROSCI.17-21-](https://doi.org/10.1523/JNEUROSCI.17-21-08259.1997)  
558 [08259.1997](https://doi.org/10.1523/JNEUROSCI.17-21-08259.1997)
- 559 Crampton, W. G. R. (2019). Electroreception, electrogenesis and electric signal evolution.  
560 *Journal of Fish Biology*, 95(1), 92–134. <https://doi.org/10.1111/jfb.13922>
- 561 Curtis, C. E., & Lee, D. (2010). Beyond working memory: the role of persistent activity in  
562 decision making. *Trends in Cognitive Sciences*, 14(5), 216–222.  
563 <https://doi.org/https://doi.org/10.1016/j.tics.2010.03.006>
- 564 Driscoll, M., & Chalfie, M. (1991). The *mec-4* gene is a member of a family of  
565 *Caenorhabditis elegans* genes that can mutate to induce neuronal degeneration. *Nature*,  
566 349(6310), 588–593. <https://doi.org/10.1038/349588a0>
- 567 Flavell, S. W., Raizen, D. M., & You, Y.-J. (2020). Behavioral States. *Genetics*, 216(2), 315–  
568 332. <https://doi.org/10.1534/genetics.120.303539>
- 569 Fujiwara, M, Ishihara, T., & Katsura, I. (1999). A novel WD40 protein, CHE-2, acts cell-  
570 autonomously in the formation of *C. elegans* sensory cilia. *Development*, 126(21), 4839–



- 571 4848. <https://doi.org/10.1242/dev.126.21.4839>
- 572 Fujiwara, Manabi, Sengupta, P., & McIntire, S. L. (2002). Regulation of body size and  
573 behavioral state of *C. elegans* by sensory perception and the egl-4 cGMP-dependent  
574 protein kinase. *Neuron*, 36(6), 1091–1102. <https://doi.org/10.1016/S0896->  
575 6273(02)01093-0
- 576 Gabel, C. V., Gabel, H., Pavlichin, D., Kao, A., Clark, D. A., & Samuel, A. D. T. (2007).  
577 Neural Circuits Mediate Electrosensory Behavior in *Caenorhabditis elegans*. *Journal of*  
578 *Neuroscience*, 27(28), 7586–7596. <https://doi.org/10.1523/JNEUROSCI.0775-07.2007>
- 579 Huang, M., & Chalfie, M. (1994). Gene interactions affecting mechanosensory transduction  
580 in *Caenorhabditis elegans*. *Nature*, 367(6462), 467–470.  
581 <https://doi.org/10.1038/367467a0>
- 582 Istenič, L., & Bulog, B. (1984). Some evidence for the ampullary organs in the European  
583 cave salamander *Proteus anguinus* (Urodela, Amphibia). *Cell and Tissue Research*,  
584 235(2), 393–402. <https://doi.org/10.1007/BF00217865>
- 585 Kang, L., Gao, J., Schafer, W. R., Xie, Z., & Xu, X. Z. S. (2010). *C. elegans* TRP Family  
586 Protein TRP-4 Is a Pore-Forming Subunit of a Native Mechanotransduction Channel.  
587 *Neuron*, 67(3), 381–391. <https://doi.org/https://doi.org/10.1016/j.neuron.2010.06.032>
- 588 Kass, J., Jacob, T. C., Kim, P., & Kaplan, J. M. (2001). The EGL-3 Proprotein Convertase  
589 Regulates Mechanosensory Responses of *Caenorhabditis*  
590 *elegans*; *The Journal of Neuroscience*, 21(23), 9265 LP – 9272.  
591 <https://doi.org/10.1523/JNEUROSCI.21-23-09265.2001>
- 592 Komatsu, H., Mori, I., Rhee, J.-S., Akaike, N., & Ohshima, Y. (1996). Mutations in a Cyclic  
593 Nucleotide-Gated Channel Lead to Abnormal Thermosensation and Chemosensation in  
594 *C. elegans*. *Neuron*, 17(4), 707–718. <https://doi.org/https://doi.org/10.1016/S0896->  
595 6273(00)80202-0

- 596 Lee, R. Y. N., Lobel, L., Hengartner, M., Horvitz, H. R., & Avery, L. (1997). Mutations in  
597 the  $\alpha 1$  subunit of an L-type voltage-activated  $\text{Ca}^{2+}$  channel cause myotonia in  
598 *Caenorhabditis elegans*. *The EMBO Journal*, *16*(20), 6066–6076.  
599 [https://doi.org/https://doi.org/10.1093/emboj/16.20.6066](https://doi.org/10.1093/emboj/16.20.6066)
- 600 Li, W., Kang, L., Piggott, B. J., Feng, Z., & Xu, X. Z. S. (2011). The neural circuits and  
601 sensory channels mediating harsh touch sensation in *Caenorhabditis elegans*. *Nature*  
602 *Communications*, *2*(1), 315. <https://doi.org/10.1038/ncomms1308>
- 603 Major, G., & Tank, D. (2004). Persistent neural activity: prevalence and mechanisms.  
604 *Current Opinion in Neurobiology*, *14*(6), 675–684.  
605 [https://doi.org/https://doi.org/10.1016/j.conb.2004.10.017](https://doi.org/10.1016/j.conb.2004.10.017)
- 606 Manière, X., Lebois, F., Matic, I., Ladoux, B., Di Meglio, J.-M., & Hersen, P. (2011).  
607 Running Worms: *C. elegans* Self-Sorting by Electrotaxis. *PLOS ONE*, *6*(2), e16637.  
608 <https://doi.org/10.1371/journal.pone.0016637>
- 609 Pettigrew, J. D. (1999). Electroreception in monotremes. *Journal of Experimental Biology*,  
610 *202*(10), 1447–1454. <https://doi.org/10.1242/jeb.202.10.1447>
- 611 Riskey, M. G., Kelly, S. P., Jia, K., Grill, B., & Dawson-Scully, K. (2016). Modulating  
612 Behavior in *C. elegans* Using Electroschock and Antiepileptic Drugs. *PLOS ONE*, *11*(9),  
613 e0163786. <https://doi.org/10.1371/journal.pone.0163786>
- 614 Roth, A., & Schlegel, P. (1988). Behavioral Evidence and Supporting Electrophysiological  
615 Observations for Electroreception in the Blind Cave Salamander, *Proteus anguinus*  
616 (Urodela). *Brain, Behavior and Evolution*, *32*(5), 277–280.  
617 <https://doi.org/10.1159/000116556>
- 618 Sawin, E. R., Ranganathan, R., & Horvitz, H. R. (2000). *C. elegans* Locomotory Rate Is  
619 Modulated by the Environment through a Dopaminergic Pathway and by Experience  
620 through a Serotonergic Pathway. *Neuron*, *26*(3), 619–631.

- 621 [https://doi.org/https://doi.org/10.1016/S0896-6273\(00\)81199-X](https://doi.org/https://doi.org/10.1016/S0896-6273(00)81199-X)
- 622 Scheich, H., Langner, G., Tidemann, C., Coles, R. B., & Guppy, A. (1986). Electroreception  
623 and electrolocation in platypus. *Nature*, *319*(6052), 401–402.  
624 <https://doi.org/10.1038/319401a0>
- 625 Sukul, N. C., & Croll, N. A. (1978). Influence of potential difference and current on the  
626 electrotaxis of *Caenorhaditis elegans*. *Journal of Nematology*, *10*(4), 314–317.  
627 <http://www.ncbi.nlm.nih.gov/pubmed/19305860><http://www.pubmedcentral.nih.gov>  
628 </articlerender.fcgi?artid=PMC2617915>
- 629 Sutton, G. P., Clarke, D., Morley, E. L., & Robert, D. (2016). Mechanosensory hairs in  
630 bumblebees (&em&gt;*Bombus terrestris*&lt;/em&gt;) detect weak electric fields.  
631 *Proceedings of the National Academy of Sciences*, *113*(26), 7261 LP – 7265.  
632 <https://doi.org/10.1073/pnas.1601624113>
- 633 Tarpley, J. W., Shlifer, I. G., Halladay, L. R., & Blair, H. T. (2010). Conditioned turning  
634 behavior: a Pavlovian fear response expressed during the post-encounter period  
635 following aversive stimulation. *Neuroscience*, *169*(4), 1689–1704.  
636 <https://doi.org/10.1016/j.neuroscience.2010.06.046>
- 637 Tobin, D. M., Madsen, D. M., Kahn-Kirby, A., Peckol, E. L., Moulder, G., Barstead, R.,  
638 Maricq, A. V., & Bargmann, C. I. (2002). Combinatorial Expression of TRPV Channel  
639 Proteins Defines Their Sensory Functions and Subcellular Localization in *C. elegans*  
640 Neurons. *Neuron*, *35*(2), 307–318. [https://doi.org/https://doi.org/10.1016/S0896-](https://doi.org/https://doi.org/10.1016/S0896-6273(02)00757-2)  
641 [6273\(02\)00757-2](6273(02)00757-2)
- 642 Tully, T., Cambiazo, V., & Kruse, L. (1994). Memory through metamorphosis in normal and  
643 mutant *Drosophila*. *The Journal of Neuroscience*, *14*(1), 68 LP – 74.  
644 <https://doi.org/10.1523/JNEUROSCI.14-01-00068.1994>
- 645 von der Emde, G., Schwarz, S., Gomez, L., Budelli, R., & Grant, K. (1998). Electric fish

646           measure distance in the dark. *Nature*, 395(6705), 890–894.  
647           <https://doi.org/10.1038/27655>  
648 Webster, M. A. (2012). Evolving concepts of sensory adaptation. *F1000 Biology Reports*, 4,  
649           21. <https://doi.org/10.3410/B4-21>  
650 Wiltschko, W., & Wiltschko, R. (2005). Magnetic orientation and magnetoreception in birds  
651           and other animals. *Journal of Comparative Physiology A*, 191(8), 675–693.  
652           <https://doi.org/10.1007/s00359-005-0627-7>  
653  
654

Figure 1

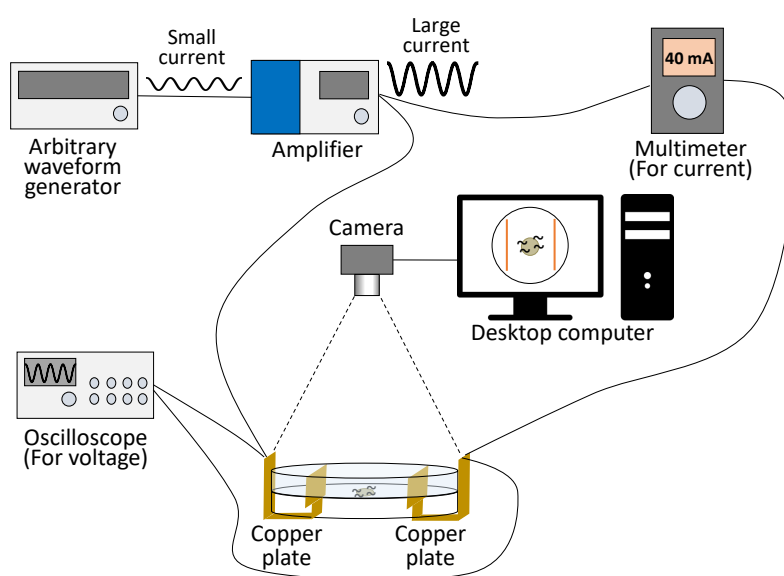

Figure 2

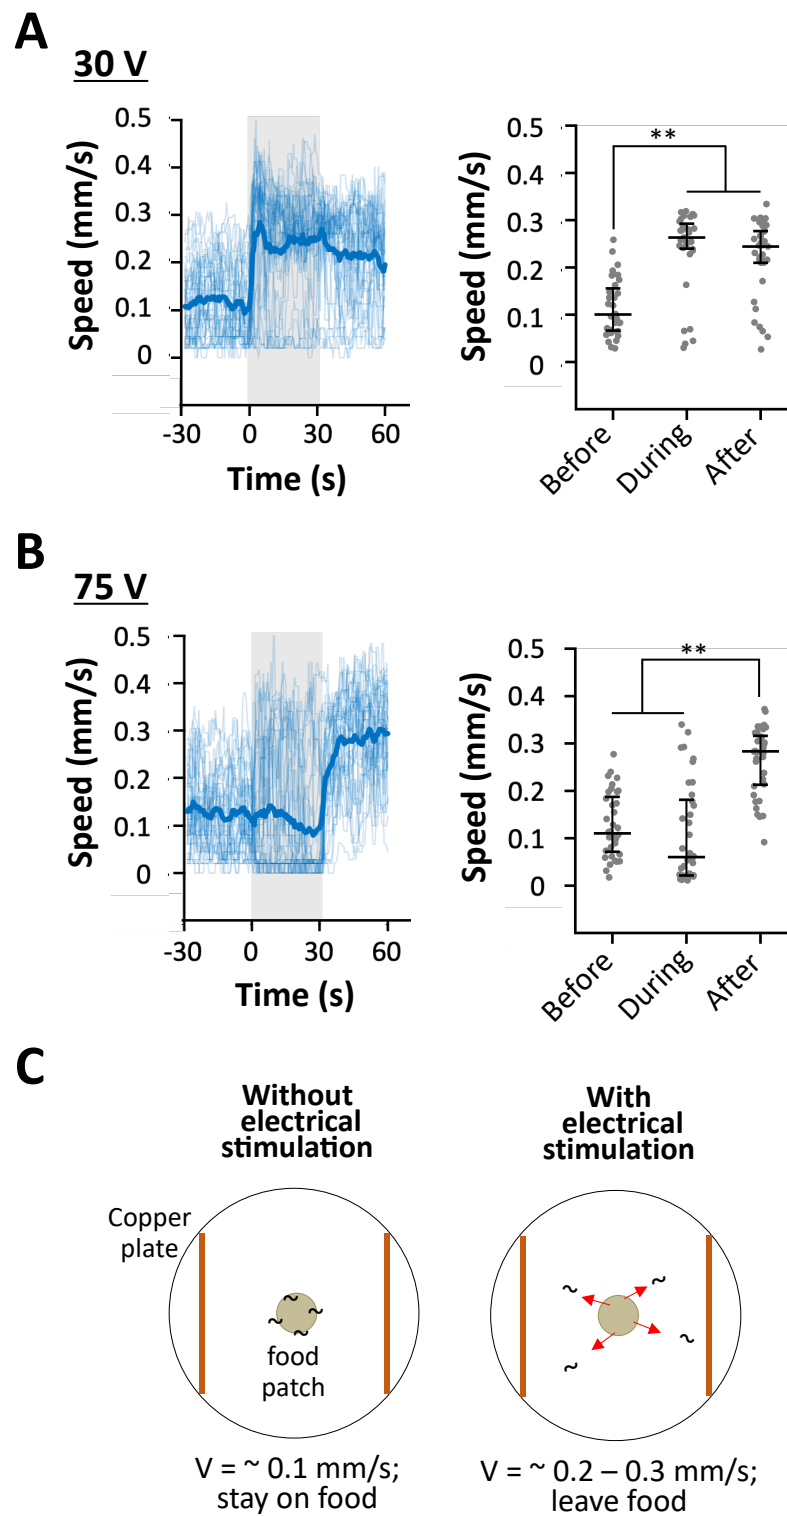

Figure 3

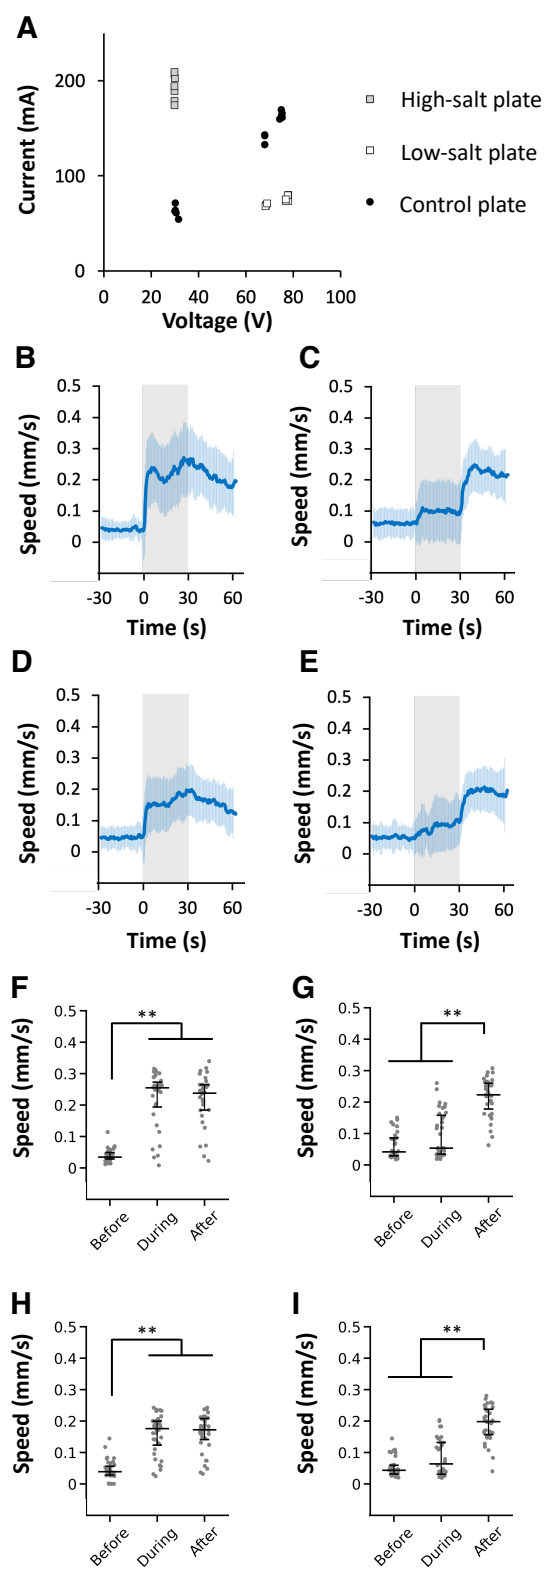

Figure 4

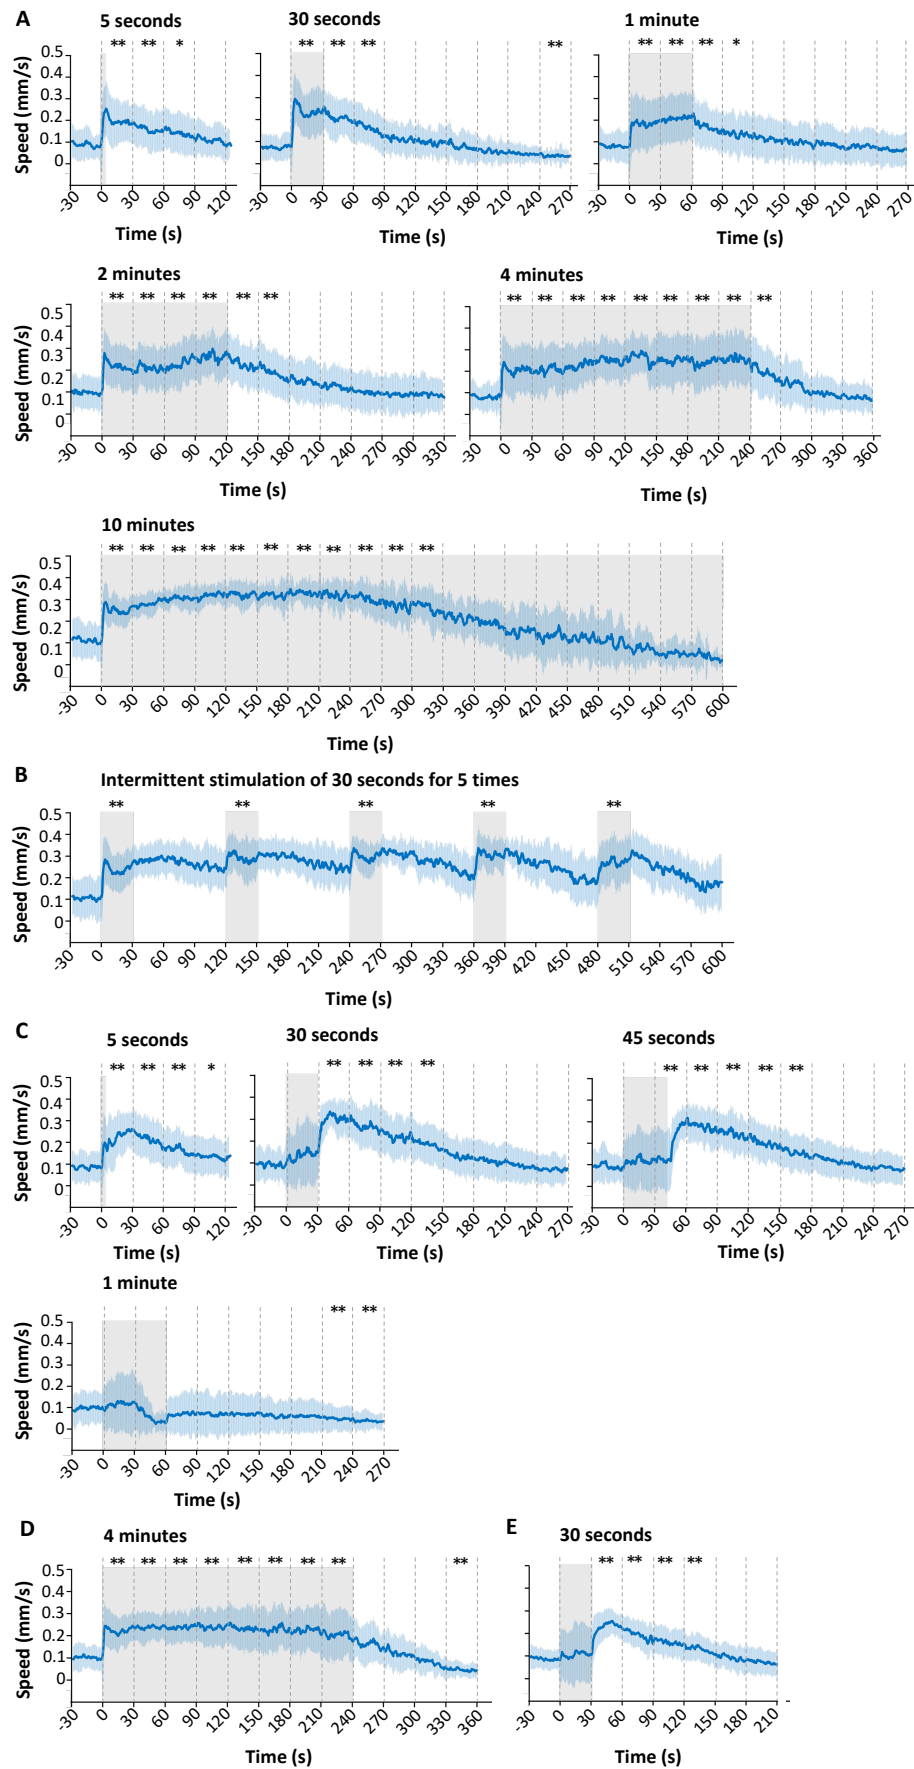



Figure 5

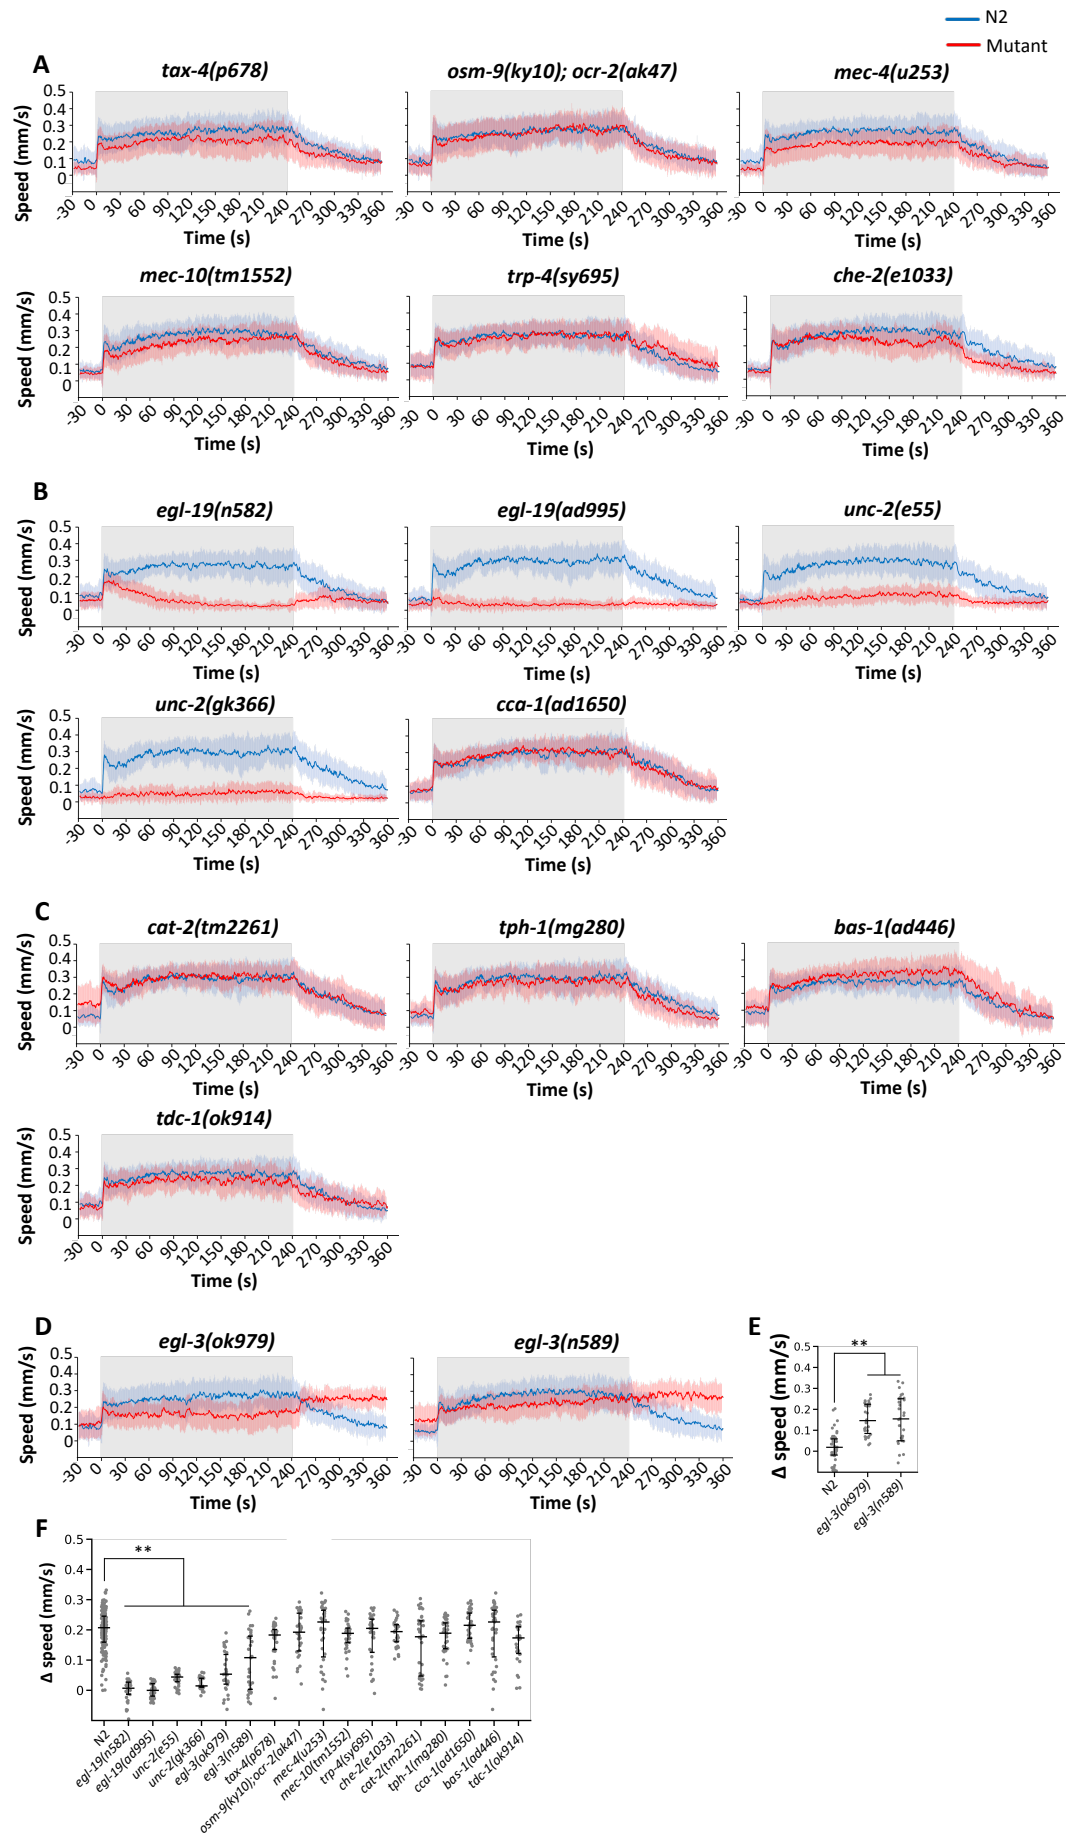

Figure 6

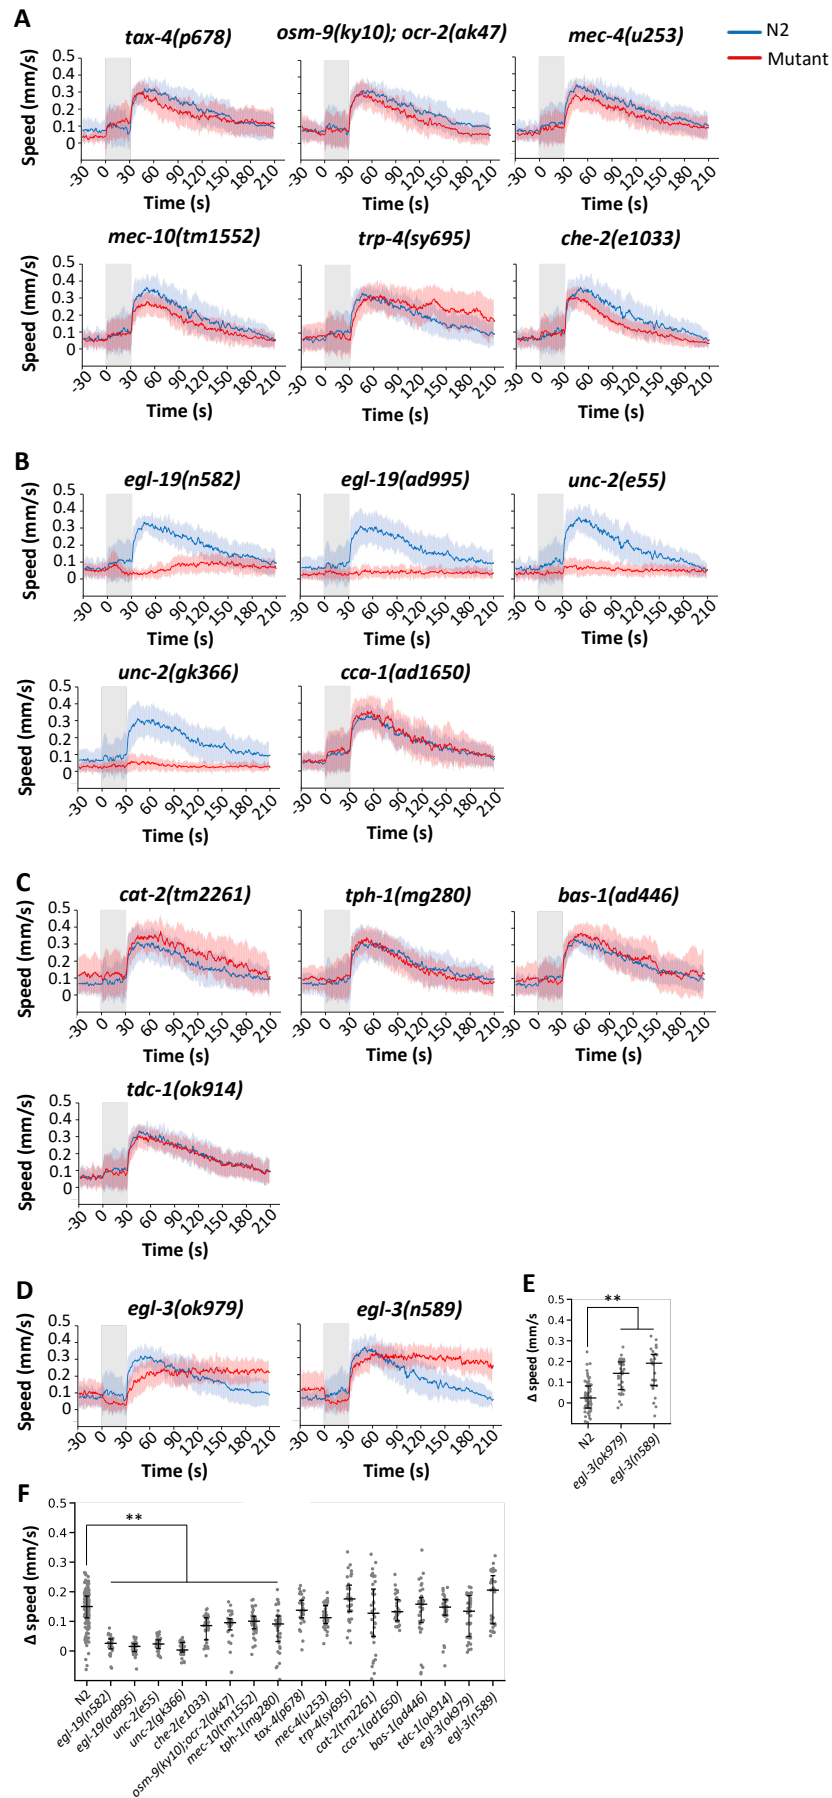

Figure 7

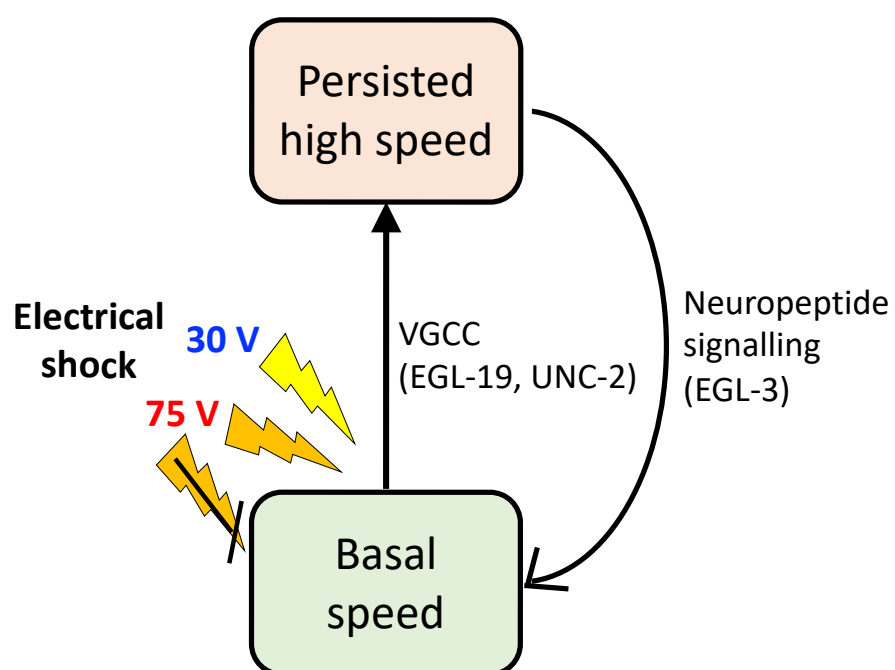

## Figure 2—figure supplement 1

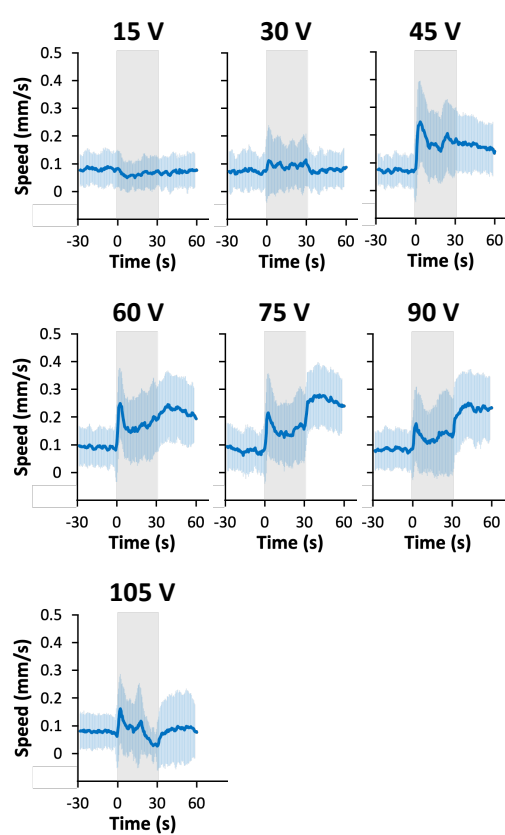

## Figure 2—figure supplement 2

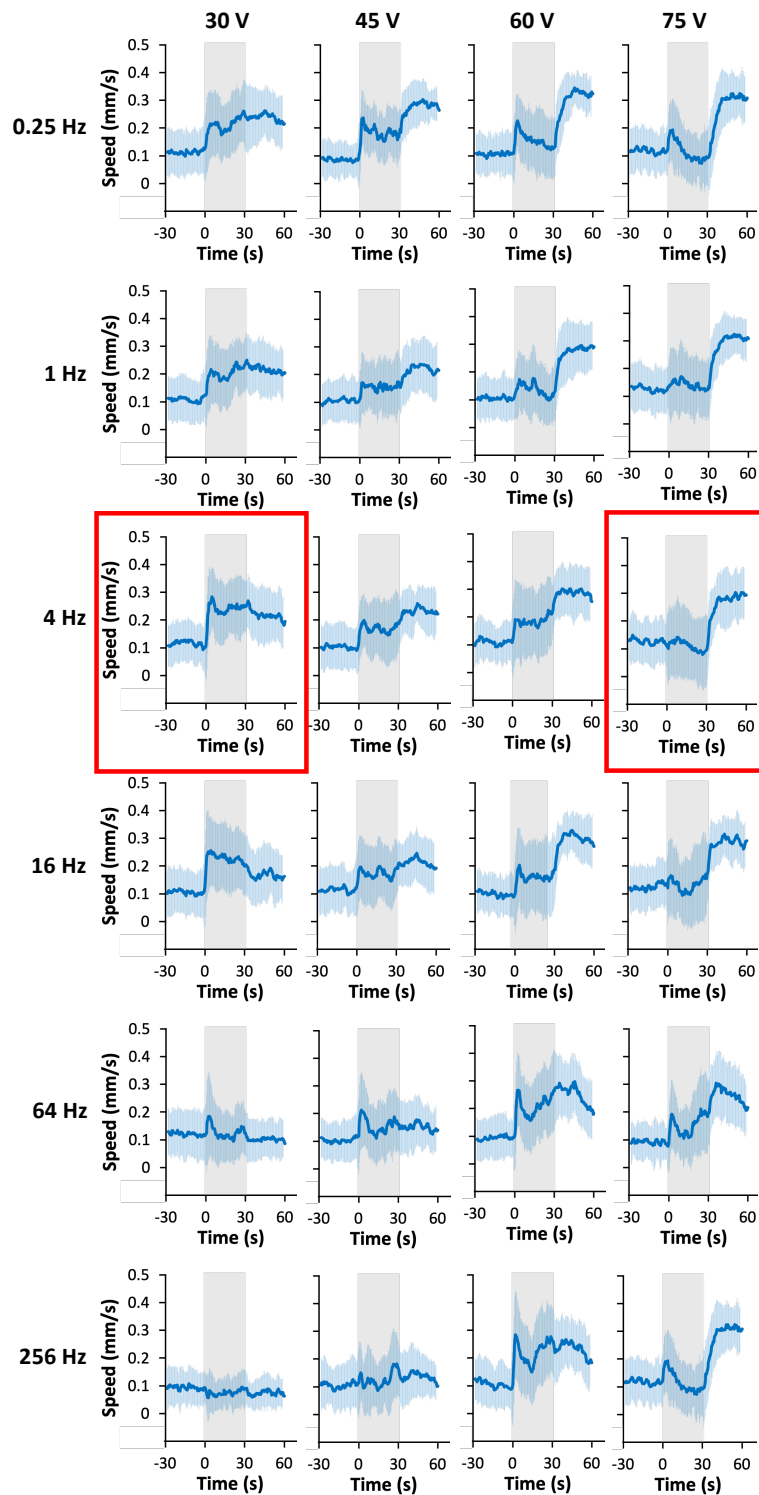

## Figure 2—figure supplement 3

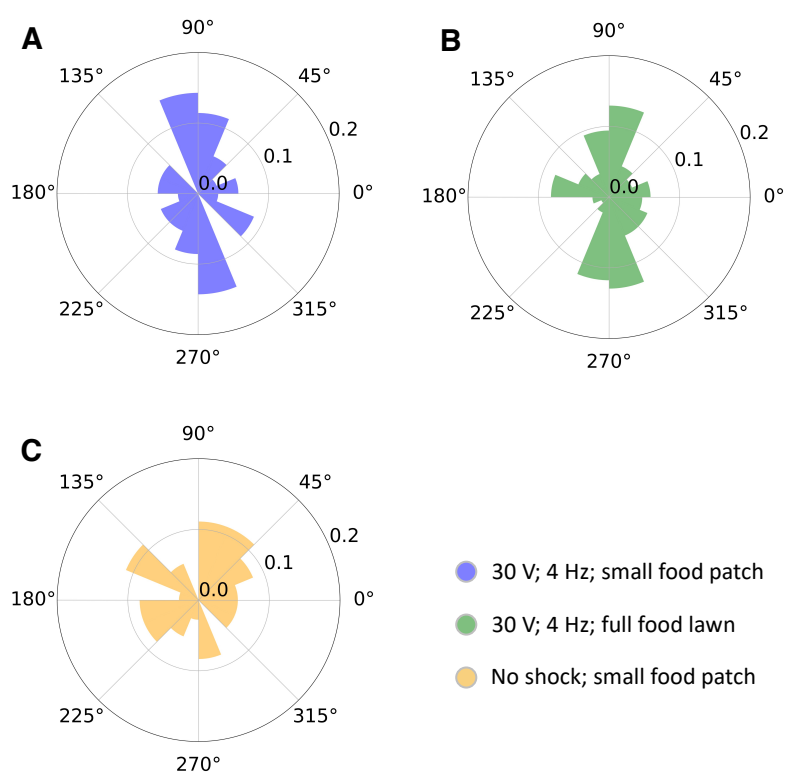

Figure 2—figure supplement 4

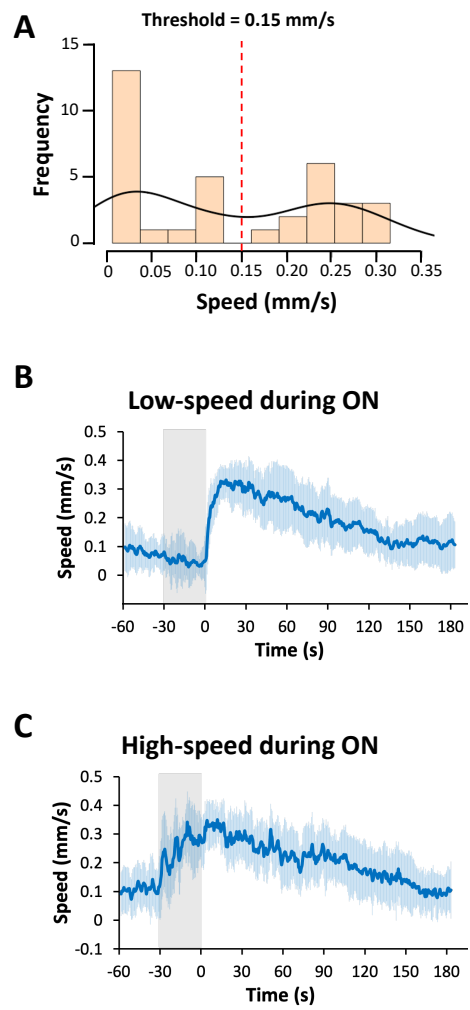

Figure 4—figure supplement 1

**A**

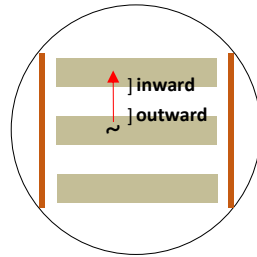

**B**

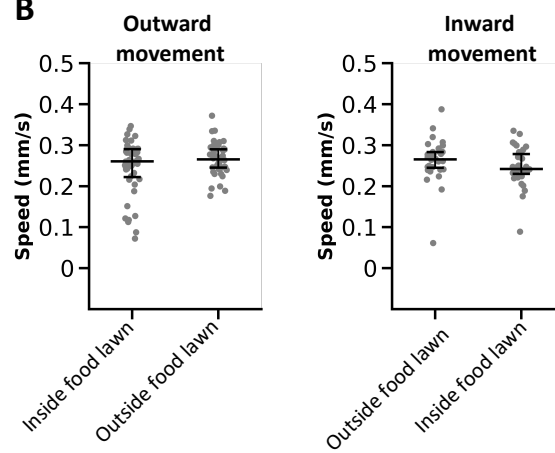

Source: http://biorxiv.org/content/10.1101/2021.09.07.459218v1.full.pdf
